# Supplementary material for: Antimicrobial Resistance Prediction for Gram-Negative Bacteria via Game Theory-Based Feature Evaluation
Source: PubMed Central journal article supplement (PMC6785542; doi:10.1038/s41598-019-50686-z), 2019-10-09
Supplement: 41598_2019_50686_MOESM1_ESM.pdf [file 41598_2019_50686_MOESM1_ESM.pdf]

# Antimicrobial Resistance Prediction for Gram-Negative Bacteria via Game Theory-Based Feature Evaluation

Abu Sayed Chowdhury<sup>1,\*</sup>, Douglas R. Call<sup>1,2</sup>, and Shira L. Broshat<sup>1,2,3</sup>

<sup>1</sup>School of Electrical Engineering and Computer Science, Washington State University,  
P.O. Box 642752, Pullman, Washington, USA

<sup>2</sup>Paul G. Allen School for Global Animal Health, Washington State University, P.O. Box  
647090, Pullman, Washington, USA

<sup>3</sup>Department of Veterinary Microbiology and Pathology, Washington State University, P.O.  
Box 647040, Pullman, Washington, USA

## Parameters used to tune SVM models

Table S1:  $C$  and  $\gamma$  values selected for the SVM radial model for  $\delta = 3$  (corresponding best feature subset in parentheses).

| AMR                                    | Oversampling |             | Undersampling |             |
|----------------------------------------|--------------|-------------|---------------|-------------|
|                                        | $C$          | $\gamma$    | $C$           | $\gamma$    |
| acetyltransferase ( <i>aac</i> )       | 8 (6)        | 0.16667 (6) | 4 (5)         | 0.2 (5)     |
| $\beta$ -lactamase ( <i>bla</i> )      | 4 (18)       | 0.0556 (18) | 4 (11)        | 0.0909 (11) |
| dihydrofolate reductase ( <i>dfr</i> ) | 4 (5)        | 0.2 (5)     | 4 (25)        | 0.04 (25)   |

## Unique protein names with NCBI accession numbers obtained from *Acinetobacter*, *Klebsiella*, *Campylobacter*, *Salmonella*, and *Escherichia*

Table S2: List of 33 sequences that convey resistance to *aac*.

| NCBI accession number | Protein name                                                                 |
|-----------------------|------------------------------------------------------------------------------|
| ESD46483              | aminoglycoside 3-N-acetyltransferase                                         |
| SLR23795              | aminoglycoside acetyltransferase                                             |
| ALP55389              | aminoglycoside N3'-acetyltransferase (plasmid)                               |
| KYH57362              | aminoglycoside 3-N-acetyltransferase                                         |
| KDJ63161              | aminoglycoside N(3')-acetyltransferase IV                                    |
| KQD27496              | gentamicin 3'-acetyltransferase                                              |
| WP_015243635          | AAC(3)-I family aminoglycoside N-acetyltransferase                           |
| RFN37427              | Aminoglycoside N(3')-acetyltransferase III                                   |
| EHC71407              | Aminoglycoside acetyltransferase                                             |
| WP_016541245          | MULTISPECIES: aminoglycoside N-acetyltransferase AAC(6')-Ih                  |
| WP_005202238          | MULTISPECIES: AAC(6')-Ighjkrstuvwx family aminoglycoside N-acetyltransferase |
| WP_005145021          | AAC(6')-Ighjkrstuvwx family aminoglycoside N-acetyltransferase               |
| WP_005288246          | MULTISPECIES: AAC(6')-Ighjkrstuvwx family aminoglycoside N-acetyltransferase |
| WP_005269797          | AAC(6')-Ighjkrstuvwx family aminoglycoside N-acetyltransferase               |
| WP_004670361          | AAC(6')-Ighjkrstuvwx family aminoglycoside N-acetyltransferase               |
| WP_017395772          | AAC(6')-Ighjkrstuvwx family aminoglycoside N-acetyltransferase               |

|              |                                                                |
|--------------|----------------------------------------------------------------|
| WP_005062866 | AAC(6')-Ighjkrstuvwx family aminoglycoside N-acetyltransferase |
| WP_085334908 | aminoglycoside N-acetyltransferase AAC(6')-Id                  |
| WP_069722139 | cryptic aminoglycoside N-acetyltransferase AAC(6')-Iy/Iaa      |
| OKB62973     | AacA4 family aminoglycoside N(6')-acetyltransferase            |
| CAG26810     | 6'-N-aminoglycoside acetyltransferase type IV                  |
| ABN48510     | AacA4                                                          |
| KMH34956     | aminoglycoside N(6')-acetyltransferase type 1                  |
| BAM45412     | aminoglycoside-(6')-N-acetyltransferase type Ib                |
| AFG73657     | aminoglycoside acetyltransferase                               |
| WP_012477386 | aminoglycoside 6'-N-acetyltransferase AacA38                   |
| ANS91765     | Aminoglycoside N(6')-acetyltransferase type 1 (plasmid)        |
| ADX02779     | Aminoglycoside 6'-N-acetyltransferase                          |
| YP_006953604 | aminoglycoside acetyltransferase                               |
| WP_024437351 | AAC(6')-Ia family aminoglycoside 6'-N-acetyltransferase AacA43 |
| WP_032489895 | aminoglycoside 6'-N-acetyltransferase AAC(6')-Ia               |
| YP_001552089 | aminoglycoside N(6')-acetyltransferase (plasmid)               |
| WP_079849740 | aminoglycoside 6'-acetyltransferase                            |

Table S3: List of 43 sequences that convey resistance to *bla*.

| NCBI accession number | Protein name                                           |
|-----------------------|--------------------------------------------------------|
| ABQ42698              | AmpC beta-lactamase                                    |
| WP_063857785          | cephalosporin-hydrolyzing class C beta-lactamase ACT-8 |
| AKN19343              | blaCMY-16 (plasmid)                                    |
| CQR83532              | beta-lactamase/D-alanine carboxypeptidase              |
| WP_032492458          | CMY-1/MOX family class C beta-lactamase CMY-11         |
| SLR23824              | beta-lactamase                                         |
| AFK78219              | extended-spectrum beta-lactamase GES-11                |
| AHD24679              | beta-lactamase BEL-1 (plasmid)                         |
| AMS25623              | carbapenem-hydrolyzing class A beta-lactamase KPC-34   |
| ABF29644              | beta-lactamase, partial (plasmid)                      |
| EJK91031              | beta-lactamase                                         |
| AAG45716              | extended spectrum beta lactamase (plasmid)             |

|              |                                                                    |
|--------------|--------------------------------------------------------------------|
| WP_063860923 | MULTISPECIES: class A broad-spectrum beta-lactamase OKP-B-5        |
| AMM70781     | TEM family class A beta-lactamase, partial                         |
| AKE33357     | CTX-M1, partial                                                    |
| WP_014228247 | MULTISPECIES: class A extended-spectrum beta-lactamase OXY-1-1     |
| WP_049127974 | OXY-2 family class A extended-spectrum beta-lactamase              |
| ABQ10556     | extended-spectrum beta-lactamase PER-1                             |
| ACG50807     | extended-spectrum beta-lactamase PER-1, partial                    |
| ACG50811     | extended-spectrum beta-lactamase PER-1, partial                    |
| CAA63714     | extended-spectrum beta-lactamase                                   |
| WP_063859341 | RTG family carbenicillin-hydrolyzing class A beta-lactamase CARB-5 |
| ACN89662     | beta-lactamase CARB-4                                              |
| KMX40042     | beta-lactamase PSE-1                                               |
| AMW97111     | Beta-lactamase                                                     |
| SCY69726     | Beta-lactamase OXA-1 precursor                                     |
| WP_013279374 | class D beta-lactamase                                             |
| CHQ03353     | Beta-lactamase OXA-10 precursor                                    |
| CAP69660     | OXA-129 beta-lactamase                                             |
| YP_006953608 | OXA-2 (plasmid)                                                    |
| ACC55538     | Beta-lactamase class D                                             |
| YP_006958782 | OXA-48 (plasmid)                                                   |
| YP_001928076 | OXA-9 (plasmid)                                                    |
| AJD77126     | beta-lactamase Oxa9-like protein (plasmid)                         |
| EWE59955     | beta-lactamase OXA-9                                               |
| YP_008725242 | metallo-beta-lactamase IMP-4 (plasmid)                             |
| AAK13430     | metallo-beta-lactamase IMP-8 (plasmid)                             |
| WP_063860573 | subclass B1 metallo-beta-lactamase IMP-11                          |
| ACT80138     | metallo-beta-lactamase IMP-14a                                     |
| ARJ98520     | subclass B1 metallo-beta-lactamase                                 |
| AAX76774     | metallo-beta-lactamase SIM-1                                       |
| ABS29633     | metallo-beta lactamase protein                                     |
| WP_013149463 | VIM family subclass B1 metallo-beta-lactamase                      |

Table S4: List of 28 sequences that convey resistance to *dfr*.

| NCBI accession number | Protein name                                                               |
|-----------------------|----------------------------------------------------------------------------|
| YP_002527542          | dihydrofolate reductase type I DhfrA1 (plasmid)                            |
| CAX63171              | dihydrofolate reductase                                                    |
| KRR78083              | hypothetical protein AR269_18705, partial                                  |
| AAF27725              | dihydrofolate reductase DHFRXVb                                            |
| WP_063844288          | trimethoprim-resistant repeat-containing dihydrofolate reductase DfrA1     |
| AAA92749              | dihydrofolate reductase (plasmid)                                          |
| AAX18270              | dihydrofolate reductase type IIIb (plasmid)                                |
| WP_063106511          | hypothetical protein                                                       |
| YP_008060587          | dihydrofolate reductase                                                    |
| WP_032165731          | DfrA13/DfrA21 family trimethoprim-resistant dihydrofolate reductase        |
| WP_012221074          | trimethoprim-resistant dihydrofolate reductase DfrA12                      |
| YP_006953259          | DfrA14, trimethoprim-insensitive class A dihydrofolate reductase (plasmid) |
| CUW83646              | Dihydrofolate reductase type 5                                             |
| AIU96905              | dihydrofolate reductase (plasmid)                                          |
| WP_015345005          | dihydrofolate reductase                                                    |
| AQS26692              | dihydrofolate reductase                                                    |
| ACJ22910              | dihydrofolate reductase-like protein                                       |
| CAD11597              | dihydrofolate reductase                                                    |
| KTO00745              | dihydrofolate reductase                                                    |
| AID93395              | dihydrofolate reductase (plasmid)                                          |
| APD70467              | DfrA23                                                                     |
| WP_074325914          | trimethoprim-resistant dihydrofolate reductase DfrA24                      |
| CAL48457              | putative trimethoprim resistance dihydrofolate reductase                   |
| AIX48195              | dihydrofolate reductase                                                    |
| AAY33960              | dihydrofolate reductase (plasmid)                                          |
| YP_009182144          | dihydrofolate reductase (plasmid)                                          |
| ACR57831              | dihydrofolate reductase type II                                            |
| WP_063844479          | trimethoprim-resistant dihydrofolate reductase DfrB6                       |

Table S5: List of 64 essential gene sequences that do not convey resistance.

| NCBI accession number | Protein name                                                                                                       |
|-----------------------|--------------------------------------------------------------------------------------------------------------------|
| CCZ50495              | dNA primase                                                                                                        |
| CCZ50068              | dTDP-4-dehydrorhamnose 3 5-epimerase                                                                               |
| CCZ50185              | na <sup>+</sup> dependent nucleoside transporter domain protein                                                    |
| CCZ50559              | aspartate-semialdehyde dehydrogenase                                                                               |
| CCZ50590              | single-stranded DNA-binding protein                                                                                |
| CCZ50619              | hypoxanthine phosphoribosyltransferase                                                                             |
| CCZ50687              | serine acetyltransferase                                                                                           |
| CCZ50811              | enoyl-[acyl-carrier-protein] reductase [NADH]                                                                      |
| CCZ51255              | dNA gyrase subunit B                                                                                               |
| CCZ51266              | nucleoside diphosphate kinase                                                                                      |
| CCZ51280              | dNA polymerase III subunit beta                                                                                    |
| CCZ51621              | uDP-N-acetylglucosamine-N-acetylmuramyl-(pentapeptide) pyrophosphoryl-undecaprenol N-acetylglucosamine transferase |
| CCZ51503              | malonyl CoA-acyl carrier protein transacylase                                                                      |
| CCZ49657              | dihydropteroate synthase                                                                                           |
| WP_024131855          | long-chain-fatty-acid-CoA ligase FadD                                                                              |
| ABX21148              | hypothetical protein SARI_01246                                                                                    |
| ABX21165              | hypothetical protein SARI_01263                                                                                    |
| ABX21677              | hypothetical protein SARI_01791                                                                                    |
| ABX22149              | hypothetical protein SARI_02286                                                                                    |
| WP_000121960          | DNA polymerase III subunit gamma/tau                                                                               |
| WP_012210538          | undecaprenyldiphospho-muramoylpentapeptide beta-N-acetylglucosaminyltransferase                                    |
| ABX23376              | hypothetical protein SARI_03561                                                                                    |
| ABX23719              | hypothetical protein SARI_03925                                                                                    |
| ABX23736              | hypothetical protein SARI_03942                                                                                    |
| ABX24112              | hypothetical protein SARI_04330                                                                                    |
| ABX24229              | hypothetical protein SARI_04454                                                                                    |
| ABX20543              | hypothetical protein SARI_00617                                                                                    |
| AKT91479              | chromosomal replication initiator protein                                                                          |

|              |                                                                              |
|--------------|------------------------------------------------------------------------------|
| AKT91578     | DNA topoisomerase I                                                          |
| AKT92658     | serine O-acetyltransferase                                                   |
| AKT91480     | DNA polymerase III, beta subunit                                             |
| AKT92884     | cytidylate kinase                                                            |
| AKT92887     | dihydropteroate synthase                                                     |
| AKT92937     | enoyl-[acp] reductase                                                        |
| AKT93080     | aspartate-semialdehyde dehydrogenase                                         |
| AKT93081     | DNA gyrase, subunit A                                                        |
| AKT93084     | DNA polymerase III, gamma and tau subunits                                   |
| AKT93257     | nucleoside diphosphate kinase                                                |
| AKT93280     | DNA polymerase III, alpha subunit                                            |
| AKT91859     | malonyl-CoA-[acp] transacylase                                               |
| AKT92225     | primosomal protein N'                                                        |
| STP18534     | nucleoside diphosphate kinase                                                |
| AAN82658     | Aspartate-semialdehyde dehydrogenase                                         |
| WP_064221542 | lipopolysaccharide core heptose(II) kinase RfaY                              |
| AAN83054     | DNA gyrase subunit B                                                         |
| WP_000673456 | MULTISPECIES: DNA polymerase III subunit beta                                |
| WP_016231270 | chromosomal replication initiator protein DnaA                               |
| ABE08803     | transport of nucleosides, permease protein                                   |
| WP_060615308 | DNA topoisomerase IV subunit B                                               |
| WP_000918851 | DNA primase                                                                  |
| WP_001047338 | MULTISPECIES: octaprenyl diphosphate synthase                                |
| WP_000383427 | DNA helicase II                                                              |
| WP_000194413 | cysteine hydrolase                                                           |
| ABE09848     | multifunctional protein; 3-hydroxyacyl-CoA dehydrogenase                     |
| CDL60715     | DNA polymerase III alpha subunit                                             |
| CDL61206     | Phosphopantothencysteine decarboxylase / Phosphopantothencysteine synthetase |
| CDL61311     | 3-oxoacyl-[acyl-carrier-protein] synthase, KASII                             |
| CDL61334     | CDP-diacylglycerol-serine O-phosphatidyltransferase                          |
| CDL61377     | DNA primase                                                                  |

|          |                                                                                                                    |
|----------|--------------------------------------------------------------------------------------------------------------------|
| CDL61843 | dTDP-4-dehydrorhamnose 3,5-epimerase                                                                               |
| CDL63342 | Pyridoxine 5'-phosphate synthase                                                                                   |
| CDL64114 | Phosphatidylglycerophosphatase A                                                                                   |
| CDL64552 | UDP-N-acetylglucosamine-N-acetylmuramyl-(pentapeptide) pyrophosphoryl-undecaprenol N-acetylglucosamine transferase |
| CDL65005 | 3-oxoacyl-[acyl-carrier-protein] synthase, KASIII                                                                  |

Table S6: List of 7 histone acetyltransferases that do not convey resistance.

| NCBI accession number | Protein name                       |
|-----------------------|------------------------------------|
| OBL67881              | histone acetyltransferase          |
| ALX99713              | histone acetyltransferase          |
| KZO64708              | histone acetyltransferase          |
| OJR64716              | histone acetyltransferase, partial |
| OCL31643              | histone acetyltransferase          |
| AJC06431              | histone acetyltransferase          |
| PAW16127              | histone acetyltransferase          |

**Unique protein names with NCBI accession numbers obtained from *Pseudomonas*, *Vibrio*, and *Enterobacter***

Table S7: List of 10 sequences that convey resistance to *aac*.

| NCBI accession number | Protein name                                                                              |
|-----------------------|-------------------------------------------------------------------------------------------|
| CAA39184              | aminoglycoside-(3)-N-acetyl-transferase isoenzyme III                                     |
| AAN61405              | aminoglycoside 3-N-acetyltransferase type II                                              |
| CAD38269              | gentamicin resistance protein, partial                                                    |
| AAB60000              | aminoglycoside-(3)-acetyltransferase AacC-A1 or AacC1 or AAC-(3)-Ia (plasmid)             |
| AAA25688              | 6'-N-acetyltransferase                                                                    |
| AAA25680              | aminoglycoside 6'-N-acetyltransferase                                                     |
| AAL82588              | aminoglycoside 3-N-acetyltransferase/aminoglycoside 6'-N-acetyltransferase fusion protein |
| CAE48335              | AAC(6')-30/AAC(6')-Ib'                                                                    |



|          |                         |
|----------|-------------------------|
| AAA16194 | AAC 3-VI protein        |
| CAA39038 | AG-6'-acetyltransferase |

Table S8: List of 43 sequences that convey resistance to *bla*.

| NCBI accession number | Protein name                               |
|-----------------------|--------------------------------------------|
| AAG07497              | beta-lactamase precursor                   |
| ABR85124              | beta-lactamase                             |
| AAV93315              | beta-lactamase                             |
| AAK18183              | beta-lactamase IBC-2                       |
| ABY91240              | beta-lactamase KPC-5                       |
| AAC64364              | beta-lactamase CEF-1 precursor             |
| AAN61404              | extended-spectrum beta-lactamase TEM-21    |
| ABC54728              | beta-lactamase CTX-M-2 precursor (plasmid) |
| AAW62294              | PER-1                                      |
| AAC27624              | beta-lactamase (plasmid)                   |
| AAC09012              | CARB-4 precursor (plasmid)                 |
| AAM74565              | carbenicillin-hydrolyzing beta-lactamase   |
| BAE71359              | beta-lactamase                             |
| CAI46978              | Class-A beta-lactamase (plasmid)           |
| AAK14791              | group 2d beta-lactamase NPS-1 (plasmid)    |
| AAK52604              | OXA-31 (plasmid)                           |
| ACI29753              | GcuF1/OXA-28 fusion protein                |
| AAB05874              | beta-lactamase OXA-15                      |
| AAN63499              | OXA-like protein                           |
| AAM08183              | beta-lactamase OXA-5                       |
| ABA54978              | OXA-9                                      |
| CAF05908              | GIM-1 protein                              |
| AAK12087              | metallo-beta-lactamase                     |
| AAK59385              | IMP-9 metallo-beta-lactamase (plasmid)     |
| AAT49068              | IMP-14                                     |
| ABC88434              | metallo-beta-lactamase IMP-22              |
| ACL31199              | IMP-13                                     |

|          |                                            |
|----------|--------------------------------------------|
| CAD12765 | metallo beta-lactamase                     |
| CAD61201 | metallo-b-lactamase                        |
| CAE46566 | metallo-beta-lactamase                     |
| AAM11666 | AmpC                                       |
| AAO42602 | beta-lactamase Mir2                        |
| AAP93849 | beta-lactamase, partial                    |
| ABF29651 | class C beta-lactamase (plasmid)           |
| ABF29654 | class C beta-lactamase (plasmid)           |
| ABF29657 | class C beta-lactamase (plasmid)           |
| BAA07922 | class C beta-lactamase precursor           |
| CAG28257 | beta-lactamase class C                     |
| AAK31368 | extended-spectrum beta-lactamase precursor |
| AAT70415 | CTX-M-37 beta-lactamase (plasmid)          |
| AAZ30046 | CTX-M-9 (plasmid)                          |
| ABM73648 | KLUC-2 (plasmid)                           |
| AAA93461 | IMI-1                                      |

Table S9: List of 8 sequences that convey resistance to *dfr*.

| NCBI accession number | Protein name                   |
|-----------------------|--------------------------------|
| ABA38890              | dihydrofolate reductase type I |
| BAD51733              | dihydrofolate reductase        |
| ABV21791              | dihydrofolate reductase        |
| ABG91835              | DHFRXVII                       |
| EEO11750              | dihydrofolate reductase        |
| CAQ52800              | DHFR2 protein                  |
| AAT49071              | dihydrofolate reductase        |
| ACO54029              | DfrA19 (plasmid)               |

Table S10: List of 25 essential gene sequences that do not convey resistance.

| NCBI accession number | Protein name                                                            |
|-----------------------|-------------------------------------------------------------------------|
| WP_022960967          | pyruvate dehydrogenase (acetyl-transferring) E1 component subunit alpha |

|              |                                                                             |
|--------------|-----------------------------------------------------------------------------|
| WP_022961210 | hypoxanthine-guanine phosphoribosyltransferase                              |
| WP_022961823 | serine O-acetyltransferase                                                  |
| WP_022961824 | nucleoside-diphosphate kinase                                               |
| WP_028614653 | undecaprenyldiphospho-muramoylpentapeptide<br>acetylglucosaminyltransferase |
| WP_040640850 | d)CMP kinase                                                                |
| WP_022962405 | [acyl-carrier-protein] S-malonyltransferase                                 |
| WP_022962412 | DNA polymerase III subunit delta'                                           |
| WP_022963226 | DNA polymerase III subunit gamma/tau                                        |
| WP_021018876 | MULTISPECIES: 1,4-dihydroxy-2-naphthoyl-CoA synthase                        |
| WP_021019516 | DNA polymerase III subunit gamma/tau                                        |
| WP_021019431 | DNA polymerase III subunit delta                                            |
| WP_027694166 | quinolinate synthase NadA                                                   |
| ASA54362     | DNA gyrase subunit A                                                        |
| WP_021020447 | CDP-diacylglycerol-glycerol-3-phosphate 3-phosphatidyltransferase           |
| WP_021020875 | permease                                                                    |
| WP_021020932 | (2E,6E)-farnesyl diphosphate synthase                                       |
| WP_021020950 | MetQ/NlpA family lipoprotein                                                |
| EGK62537     | APC family amino acid transporter                                           |
| EGK60566     | CaCA family calcium (Ca <sup>2+</sup> ):cation antiporter                   |
| EGK58767     | chloride channel (ClC) family chloride transporter                          |
| WP_013098318 | ribonuclease III                                                            |
| WP_010426391 | lipopolysaccharide heptosyltransferase RfaC                                 |
| WP_010426438 | MULTISPECIES: guanylate kinase                                              |
| KDF55569     | chromosomal replication initiator protein dnaA                              |

Table S11: List of 8 histone acetyltransferases that do not convey resistance.

| NCBI accession number | Protein name              |
|-----------------------|---------------------------|
| GBH15333              | histone acetyltransferase |
| GBH08811              | histone acetyltransferase |
| PYD93376              | histone acetyltransferase |
| PYD91560              | histone acetyltransferase |

|          |                           |
|----------|---------------------------|
| PYD90245 | histone acetyltransferase |
| KTB87679 | histone acetyltransferase |
| RFD66926 | histone acetyltransferase |
| KKP22059 | histone acetyltransferase |
